# Supplementary material for: Development of a single-step immunoassay microdevice based on a graphene oxide-containing hydrogel possessing fluorescence quenching and size separation functions
Source: Royal Society of Chemistry journal article supplement (doi:10.1039/c6an02485h), 2017-01-01
Supplement: c6an02485h1.pdf [file c6an02485h1.pdf]

## Supporting information

### Development of a single-step immunoassay microdevice based on a graphene oxide-containing hydrogel possessing fluorescence quenching and size separation functions

Akihiro Shirai, Kaho Nakashima, Kenji Sueyoshi, Tatsuro Endo and Hideaki Hisamoto  
Graduate School of Engineering, Osaka Prefecture University, Japan.

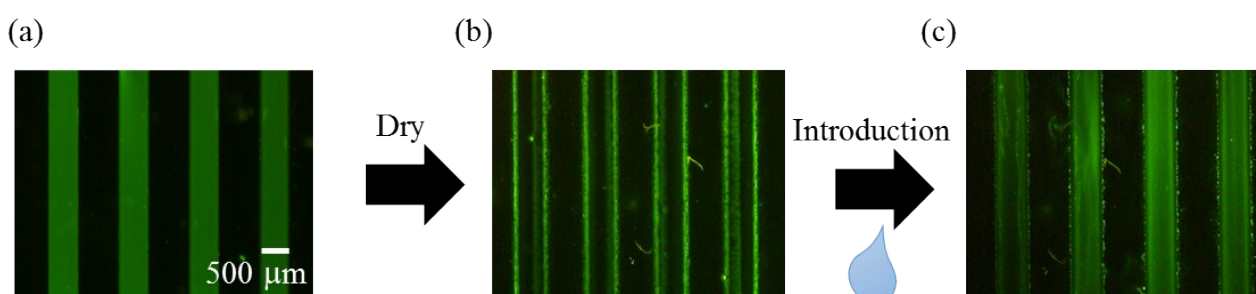

Fig. S1 (a, b) Immobilization of coating containing reagents without glycerol onto PDMS microchannel and (c) non-uniform release of reagents.

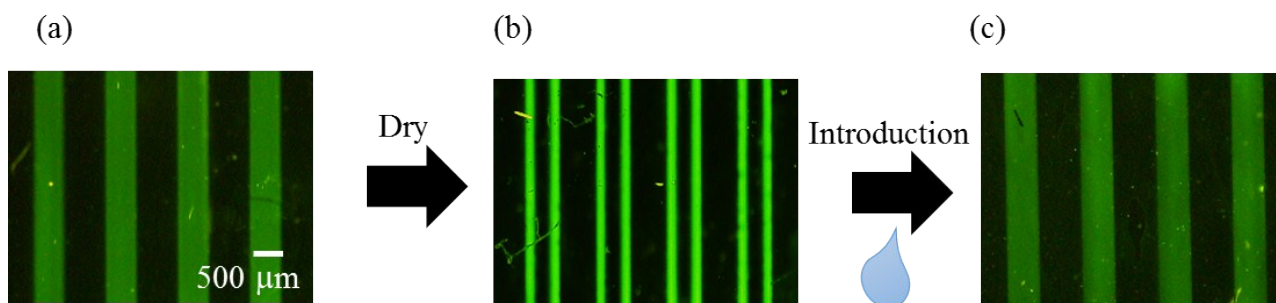

Fig. S2 (a, b) Immobilization of coating containing reagents with glycerol onto PDMS microchannel and (c) uniform release of reagents.
